# Supplementary material for: A new coupling reaction for the synthesis of ruthenium half-sandwich complexes with sterically demanding cyclopentadienyl ligands
Source: Royal Society of Chemistry journal article supplement (doi:10.1039/b618712a), 2007-01-01
Supplement: b618712a.pdf [file b618712a.pdf]

## SUPPORTING INFORMATION

### A New Coupling Reaction for the Synthesis of Ruthenium Halfsandwich Complexes with Sterically Demanding Cyclopentadienyl Ligands

Sébastien Gauthier,<sup>a</sup> Euro Solari,<sup>a</sup> Barnali Dutta,<sup>a</sup> Rosario Scopelliti<sup>a</sup> and Kay Severin<sup>a\*</sup>

Institut des Sciences et Ingénierie Chimiques

École Polytechnique Fédérale de Lausanne (EPFL)

Lausanne, SWITZERLAND

**General:** All experiments were performed inside a glovebox under an atmosphere of dinitrogen containing less than 1 ppm of oxygen and water. Thoroughly dried and deoxygenated solvents were used. Triphenylphosphine (PPh<sub>3</sub>) and bicyclo[2.2.1]hepta-2,5-diene (NBD) were purchased from Fluka. Metallic Zn was a commercial product from Aldrich. *t*-Butylacetylene was purchased from Alfa Aesar. Tricyclohexylphosphine (PCy<sub>3</sub>) was obtained from Strem Chemicals and RuCl<sub>3</sub>(H<sub>2</sub>O)<sub>n</sub> from Precious Metals Online. All chemicals were used as received, unless otherwise stated. <sup>1</sup>H, <sup>13</sup>C and <sup>31</sup>P NMR spectra were recorded on a Bruker spectrometer at 400 MHz using deuterated solvents. CD<sub>2</sub>Cl<sub>2</sub> and CDCl<sub>3</sub> (from Aldrich) for NMR experiments were degassed by three freeze-pump-thaw cycles and then purified by vacuum transfer at room temperature.

**Synthesis of complex 3:** [RuCl<sub>3</sub>(H<sub>2</sub>O)<sub>n</sub>] (500 mg, 1.90 mmol) was dissolved in 25 mL THF with heating and then the solvent was distilled off at 72 °C, normal pressure using a rotavapor. Complete removal of the solvent at this temperature led to a green insoluble material. Hence, the last portion (~5 mL) of the solvent was removed under high vacuum. The procedure was repeated and then the resulting solid (reddish brown in color) was dissolved in 10 mL of dry MeOH under nitrogen followed by the addition of *t*-butylacetylene (1.0 mL, 8.0 mmol). The closed flask was heated at 55 °C for 24 h and

then kept at  $-20\text{ }^{\circ}\text{C}$  for 24 h to ensure complete precipitation. The solid brown precipitate was isolated, washed with MeOH ( $\sim 3.0\text{ mL}$ ) followed by hexane ( $\sim 3.0\text{ mL}$ ) and dried under vacuum. Yield: 434 mg (51 %). Anal. Calcd for  $\text{C}_{38}\text{H}_{66}\text{Cl}_4\text{O}_2\text{Ru}_2$ : C, 50.78; H, 7.40. Found: C, 50.47; H, 7.36. Single crystals were obtained from cold methanol.

**Synthesis of complex 4:** The synthesis was performed analogously to that of complex 3 using ethanol (20 mL) instead of methanol. Yield: 365 mg (40 %). Anal. Calcd for  $\text{C}_{40}\text{H}_{70}\text{Cl}_4\text{O}_2\text{Ru}_2$ : C, 51.83; H, 7.61. Found: C, 51.30; H, 7.31.

**$^{13}\text{C}$  NMR peak assignment:** The following numbering scheme was used for the assignment of the  $^{13}\text{C}$  NMR data:

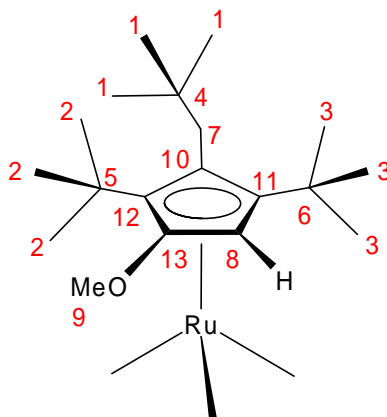

**Synthesis of complex 5:** Bicyclo[2.2.1]hepta-2,5-diene (NBD) (50  $\mu\text{L}$ , 445 mmol) was added to a solution of complex 3 (100 mg, 111  $\mu\text{mol}$ ) in EtOH (5 mL) and stirred at  $55\text{ }^{\circ}\text{C}$ . The color of the solution changed from brown to light orange. After  $\sim 3\text{ h}$ , some faint white precipitate appeared. After 6 h, the solution was filtered to remove the precipitate. The EtOH solution was concentrated under reduced pressure to give the product in form of an orange microcrystalline material. The product was washed with ethanol and dried under vacuum. Yield: 67 mg (60 %).  $^1\text{H}$  NMR ( $\text{CD}_2\text{Cl}_2$ ,  $25\text{ }^{\circ}\text{C}$ ):  $\delta$  (ppm) 5.19 (m, 1H,  $\text{NBD}_{\text{CH}=\text{CH}}$ ), 4.83 (s, 1H, Cp-H), 4.67 (m, 1H,  $\text{NBD}_{\text{CH}=\text{CH}}$ ), 4.47 (m, 1H,  $\text{NBD}_{\text{CH}=\text{CH}}$ ), 3.72 (s, 3H,  $\text{OCH}_3$ ), 3.55-3.70 (m, 3H,  $\text{NBD}_{\text{CH}=\text{CH}}$ ,  $\text{NBD}_{\text{CH}}$  bridge), 2.56 (d, 1H,  $-\text{CH}_2-$ ,  $J = 16.36$ ), 2.36 (d, 1H,  $-\text{CH}_2-$ ,  $J = 16.40$ ), 1.36 (m, 2H,  $\text{NBD}_{\text{CH}_2}$ ), 1.19 (s, 9H,  $t$ -Bu), 1.17 (s, 9H,  $t$ -Bu), 1.15 (s, 9H,  $t$ -Bu).  $^{13}\text{C}\{^1\text{H}\}$  NMR ( $\text{CD}_2\text{Cl}_2$ ,  $25\text{ }^{\circ}\text{C}$ ):  $\delta$  (ppm) 117.95, (C13),

87.67, 81.35, 80.76 (C10, C11, C12), 65.59, 62.53 (NBD<sub>CH=CH</sub>), 59.23 (C9), 57.86 (NBD<sub>bridging C</sub>), 53.09 (C8), 51.15 (NBD<sub>CH<sub>2</sub></sub>), 40.59 (C7), 37.35, 36.29, 33.77 (C4, C5, C6), 35.55, 35.08, 33.61 (C1, C2, C3). Anal. Calcd for C<sub>26</sub>H<sub>41</sub>ClORu: C, 61.70; H, 8.17. Found: C, 61.58; H, 8.19.

**Synthesis of complex 6:** PCy<sub>3</sub> (62.3 mg, 222 μmol) and excess Zn dust (1.0 g) were added to a solution of complex **3** (100 mg, 111 μmol) in THF (5 mL) and stirred at ambient temperature for 12 h. The color of the solution changed from brown to deep purple. The solution was filtered followed by complete removal of the solvent under high vacuum. Hexane was added and removed in vacuum to ensure complete removal of the THF. The product was then extracted with hexane (5 mL) while the ZnCl<sub>2</sub> formed during reaction remained as a white solid. The product was obtained by removing the hexane in vacuum. Yield: 153 mg (99 %). <sup>1</sup>H NMR (CD<sub>2</sub>Cl<sub>2</sub>, 25 °C): δ (ppm) 4.15 (s, 1H, Cp-H), 3.55 (s, 3H, OCH<sub>3</sub>), 3.23, (d, 1H, -CH<sub>2</sub>-, <sup>2</sup>J<sub>HH</sub> = 16.6 Hz), 2.75 (d, 1H, -CH<sub>2</sub>-, <sup>2</sup>J<sub>HH</sub> = 15.6 Hz), 1.47 (s, 9H, *t*-Bu), 1.34 (s, 9H, *t*-Bu), 1.15 (s, 9H, *t*-Bu), 1.16-2.20 (m, 30H, PCy<sub>3</sub>). <sup>31</sup>P{<sup>1</sup>H} NMR (CD<sub>2</sub>Cl<sub>2</sub>, 25 °C): δ (ppm) 35.39 (s, 1P, PCy<sub>3</sub>). <sup>13</sup>C{<sup>1</sup>H} NMR (CD<sub>2</sub>Cl<sub>2</sub>, 25 °C): δ (ppm) 121.25 (C13), 83.72, 81.92, 81.10 (C10, C11, C12), 61.10 (C9), 54.14 (C8), 39.31 (C7), 34.60, 34.52, 33.43 (C4, C5, C6), 35.14, 34.27, 33.92 (C1, C2, C3), 29.0-38.0 (PCy<sub>3</sub>). Anal. Calcd for C<sub>37</sub>H<sub>66</sub>ClOPRu: C, 64.00; H, 9.58. Found: C, 63.97; H, 9.44. Single crystals were obtained by slow evaporation of a solution of complex **6** in CH<sub>2</sub>Cl<sub>2</sub>/hexane.

**Synthesis of complex 7:** Excess metallic Zn (1.5 g) was added to a solution of complex **3** (100 mg, 111 μmol) in THF (5 mL) and stirred for 5 min at ambient temperature followed by the addition of PPh<sub>3</sub> (58.3 mg, 222 μmol). Stirring was continued until the color of solution became violet and no excess PPh<sub>3</sub> was detected in the <sup>31</sup>P NMR (after nearly 40 min). The Zn was filtered off and the solvent was removed in vacuum. Hexane (2 mL) was added and stirred for 5 min and the evaporated to ensure complete removal of the THF. The product was then extracted with hexane (4 mL) while the ZnCl<sub>2</sub> formed during reaction remained as a white solid. The product was obtained by removing the hexane in vacuum. Yield: 72 mg (48 %). The NMR spectra of the

complex were recorded at -20 °C because broad peaks were observed at RT (25 °C), possibly due to hindered rotation of the  $\pi$ -ligand.  $^1\text{H}$  NMR ( $\text{CD}_2\text{Cl}_2$ , -20 °C):  $\delta$  (ppm) 7.32-7.52 (m, 15H,  $\text{PPh}_3$ ), 3.59 (s, 1H, Cp-H), 3.22 (d, 1H,  $-\text{CH}_2-$ ,  $^2J_{\text{HH}} = 16.36$  Hz), 2.75 (d, 1H,  $-\text{CH}_2-$ ,  $^2J_{\text{HH}} = 16.68$  Hz), 2.63 (s, 3H,  $\text{OCH}_3$ ), 1.46 (s, 9H, *t*-Bu), 1.22 (s, 9H, *t*-Bu), 1.10 (s, 9H, *t*-Bu).  $^{31}\text{P}\{^1\text{H}\}$  NMR ( $\text{CD}_2\text{Cl}_2$ , -20 °C):  $\delta$  (ppm) 35.08 (s, 1P,  $\text{PPh}_3$ ).  $^{13}\text{C}\{^1\text{H}\}$  NMR ( $\text{CD}_2\text{Cl}_2$ , -20 °C):  $\delta$  (ppm) 129-136 (Ph), 120.04 (C13), 88.11, 83.43, 80.24 (C10, C11, C12), 57.73 (C9), 56.88 (C8), 37.02 (C7), 34.88, 32.97, 32.19 (C4, C5, C6), 33.30, 32.39, 31.98 (C1, C2, C3). Anal. Calcd for  $\text{C}_{37}\text{H}_{48}\text{ClOPRu}$ : C, 65.71; H, 7.15. Found: C, 65.88; H, 7.05. Single crystals were obtained from a solution of complex **7** in hexane.

**Synthesis of complex 8:** Excess zinc dust (50 mg) was added to a solution of complex **3** (200 mg, 222  $\mu\text{mol}$ ) in acetonitrile (10 mL). After stirring for 4 h at ambient temperature, the mixture was filtered to give a solution of a cationic tris(acetonitrile) complex.  $^1\text{H}$  NMR (400 MHz,  $\text{CD}_3\text{CN}$ ):  $\delta$  (ppm) = 4.03 (s, 1H, Cp-H), 3.54 (s, 3H,  $\text{OCH}_3$ ), 2.70 (d, 1H,  $-\text{CH}_2-$ ,  $^2J_{\text{HH}} = 16.00$  Hz), 2.35 (d, 1H,  $-\text{CH}_2-$ ,  $^2J_{\text{HH}} = 16.00$  Hz), 1.40 (s, 9H, *t*-Bu), 1.35 (s, 9H, *t*-Bu), 1.12 (s, 9H, *t*-Bu). The solution of the cationic complex was stirred at ambient temperature under an atmosphere of CO. After 24 h, the solvent was removed in vacuum and the product was purified by column chromatography (silica gel,  $\text{CH}_2\text{Cl}_2$ ). Yield: 190 mg (92 %). IR:  $\nu$  ( $\text{cm}^{-1}$ ) = 1968, 2025 (CO).  $^1\text{H}$  NMR ( $\text{CDCl}_3$ , 25 °C):  $\delta$  (ppm) 4.82 (s, 1H, Cp-H), 3.76 (s, 3H,  $\text{OCH}_3$ ), 2.92 (d, 1H,  $-\text{CH}_2-$ ,  $^2J_{\text{HH}} = 16.00$  Hz), 2.36 (d, 1H,  $-\text{CH}_2-$ ,  $^2J_{\text{HH}} = 16.00$  Hz), 1.48 (s, 9H, *t*-Bu), 1.37 (s, 9H, *t*-Bu), 1.13 (s, 9H, *t*-Bu).  $^{13}\text{C}\{^1\text{H}\}$  NMR (101 MHz,  $\text{CDCl}_3$ , 25 °C):  $\delta$  (ppm) 198.19, 198.60 (CO), 151.02 (C13), 111.14, 98.19, 95.69 (C10, C11, C12), 61.38 (C9), 58.15 (C8), 37.63 (C7), 33.19, 34.32 (C4, C5, C6), 32.05, 32.24 (C1, C2, C3). Anal. Calcd for  $\text{C}_{21}\text{H}_{33}\text{ClO}_3\text{Ru}$ : C, 53.66; H, 7.08. Found: C, 53.81; H, 7.16.

**Synthesis of complex 9:** The cationic tris(acetonitrile) complex intermediate was prepared as described for **8** using complex **4** as the starting material.  $^1\text{H}$  NMR ( $\text{CDCl}_3$ , 25 °C):  $\delta$  (ppm) 3.98 (s, 1H, Cp-H), 3.70 (m, 2H,  $\text{OCH}_2\text{CH}_3$ ), 2.70 (d, 1H,  $-\text{CH}_2-$ ,  $^2J_{\text{HH}} = 16.00$  Hz), 2.34 (d, 1H,  $-\text{CH}_2-$ ,  $^2J_{\text{HH}} = 16.00$  Hz), 1.42 (s, 9H, *t*-Bu), 1.34 (s, 9H, *t*-Bu),

1.30 (t, 3H, OCH<sub>2</sub>CH<sub>3</sub>, <sup>3</sup>J<sub>HH</sub> = 7.00 Hz), 1.12 (s, 9H, *t*-Bu). Subsequent reaction with CO gave complex **9**. Yield: 192 mg (90 %). IR:  $\nu$  (cm<sup>-1</sup>) = 1967, 2024 (CO). <sup>1</sup>H NMR (CDCl<sub>3</sub>, 25 °C):  $\delta$  (ppm) 4.78 (s, 1H, Cp-H), 3.96 (m, 2H, OCH<sub>2</sub>CH<sub>3</sub>), 2.93 (d, 1H, -CH<sub>2</sub>-, <sup>2</sup>J<sub>HH</sub> = 16.00 Hz), 2.36 (d, 1H, -CH<sub>2</sub>-, <sup>2</sup>J<sub>HH</sub> = 16.00 Hz), 1.49 (s, 9H, *t*-Bu), 1.36 (s, 9H, *t*-Bu), 1.13 (s, 9H, *t*-Bu), 0.86 (t, 3H, OCH<sub>2</sub>CH<sub>3</sub>, <sup>3</sup>J<sub>HH</sub> = 7.00 Hz). <sup>13</sup>C{<sup>1</sup>H} NMR (101 MHz, CDCl<sub>3</sub>, 25 °C):  $\delta$  (ppm) 198.31, 198.72 (CO), 150.49 (C13), 111.12, 98.03, 95.48 (C10, C11, C12), 67.50 (OCH<sub>2</sub>CH<sub>3</sub>), 61.77 (C9), 37.61 (C7), 33.18, 34.35 (C4, C5, C6), 32.04, 32.06, 32.25 (C1, C2, C3), 14.49 (s, 1C, OCH<sub>2</sub>CH<sub>3</sub>). Anal. Calcd for C<sub>22</sub>H<sub>35</sub>ClO<sub>3</sub>Ru: C, 54.59; H, 7.29. Found: C, 54.54; H, 7.39.

**Racemization of secondary alcohols:** the substrate (> 99 % ee, 0.25 mmol) dissolved in toluene (0.8 ml) was added to a flask containing the respective catalyst and K<sub>3</sub>PO<sub>4</sub> (0.25 mmol). The reactions were stirred at RT under air. After the time given, the % ee values were determined by GC using a chiral column (Chrompack CP-Sil 8 CB).

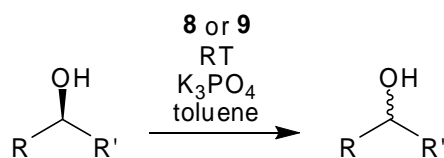

| entry | complex  | substrate                 | [cat.]<br>[mol %] | time<br>[h] | ee<br>[%] |
|-------|----------|---------------------------|-------------------|-------------|-----------|
| 1     | <b>8</b> | (S)-1-phenylethanol       | 0.25              | 0.5         | 20        |
| 2     | <b>8</b> | (S)-1-phenylethanol       | 0.25              | 1.0         | 0         |
| 3     | <b>9</b> | (S)-1-phenylethanol       | 0.25              | 0.5         | 27        |
| 4     | <b>9</b> | (S)-1-phenylethanol       | 0.25              | 1.0         | 3         |
| 5     | <b>8</b> | (S)-4-phenyl-2-butanol    | 0.5               | 1.0         | 0         |
| 6     | <b>8</b> | (S)-1-(3-naphthyl)ethanol | 0.5               | 1.0         | 0         |
| 7     | <b>8</b> | (s)-1-indanol             | 0.5               | 1.5         | 0         |
